# Supplementary material
Source: Research Square preprint supplement (doi:10.21203/rs.3.rs-8738190/v1)
Supplement: Supplementary file 1 [file 857d58b0359d2ea1ef19bad4.docx]

**Supplementary File 1**

**Questionnaire**

**Respondent’s Consent**

**Purpose of the Study:**

**This study aims to understand how building conditions and household socio-economic factors affect the health and well-being of residents living in low-cost rural homes in the Sundarban coastal region of West Bengal. In particular, it focuses on Sick Building Syndrome (SBS) — a set of health problems such as headaches, fatigue, dizziness, eye or skin irritation, and breathing difficulties that may arise from poor indoor environments. Many houses in this region are built with limited resources and are exposed to frequent flooding, dampness, and high humidity, which can worsen indoor air quality and thermal comfort. By gathering information from residents about their living conditions, health symptoms, and socio-economic circumstances, this study seeks to measure the prevalence of SBS and related building-induced health risks.**

**Consent Statement:**

I have read the above information about the study. I understand that:

- My participation in this study is completely voluntary.
- I may skip any question or withdraw from the study at any stage without giving a reason.
- My responses will be kept strictly confidential and used only for academic and research purposes.
- There are no direct risks or financial benefits to me for participating in this study.

By signing, I give my free and informed consent to participate in this study.

**Name of Respondent:** ___________________________
**Signature/Thumb Impression:** ____________________
**Date:** ____________________

| **Respondent's details:** | | | | | | | | | | | | |
| --- | --- | --- | --- | --- | --- | --- | --- | --- | --- | --- | --- | --- |
| Name: | |  | | | | Age: | | | |  | | |
| Date: | |  | | | | Address: | | | |  | | |
| Age: |  | Height: | |  | | Weight: | |  | | Gender: | |  |
| Education: |  | Island Type: | |  | | Community: | |  | | Session: | |  |
| **Climatic data:** | | | | | | | | | | | | |
| Temperature: |  | Humidity: | |  | | Wind Speed: | |  | |  | |  |
|  | |  | | | |  | | | |  | | |
| **Occupation:** | | | | | | | | | | | | |
| Occupation: | |  | | | | Type of Environment  (indoor/outdoor): | | | |  | | |
| Work schedule: | |  | | | |  | | | |  | | |
| **Building structure** | | | | | | | | | | | | |
| Type of the building (low/high rise) | |  | | | | Building materials used | | | |  | | |
| Building ventilation | |  | | | | Building innovation | | | |  | | |
| **Sick Building Syndrome:** | | | | | | | | | | | | |
| **Disease** | | | **Response of Respondents** | | | | | | | | | |
| **Strongly Agree**  **(1)** | | **Strongly Agree**  **(2)** | | **Neutral**  **(3)** | | **Disagree**  **(4)** | | **Strongly disagree**  **(5)** | |
| Fatigue | | |  | |  | |  | |  | |  | |
| Headache | | |  | |  | |  | |  | |  | |
| Dizziness | | |  | |  | |  | |  | |  | |
| Nausea/ Vomiting | | |  | |  | |  | |  | |  | |
| Shortness of breath | | |  | |  | |  | |  | |  | |
| Skin rash | | |  | |  | |  | |  | |  | |
| Dry throat | | |  | |  | |  | |  | |  | |
| Eye irritation | | |  | |  | |  | |  | |  | |
